# Supplementary material for: Cas9+ conditionally immortalized neutrophil progenitors as a tool for genome-wide CRISPR screening for neutrophil differentiation and function
Source: eLife journal article supplement (doi:10.7554/elife.82289), 2026-05-18
Supplement: supp [file elife_poa_e82289_Figure_3_figure_supplement_1.pdf › elife_poa_e82289_Figure_3_figure_supplement_1.pdf]

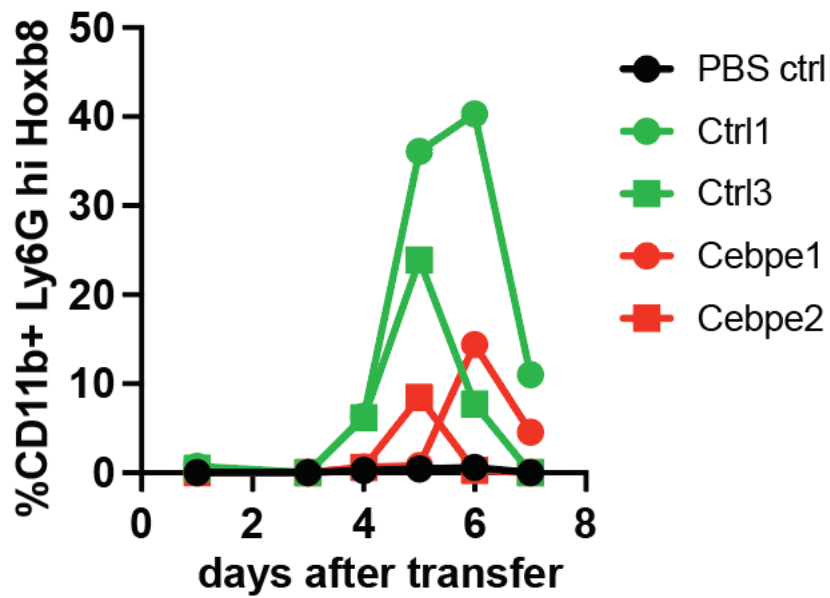

**Figure 3 – Figure Supplement 1.** Time course of differentiation of Hoxb8<sup>+</sup> neutrophil progenitors *in vivo*. Percentage of cells was measured using flow cytometry for indicated markers. Experiment was repeated twice with one mouse per cell line.
