# Supplementary material for: Cas9+ conditionally immortalized neutrophil progenitors as a tool for genome-wide CRISPR screening for neutrophil differentiation and function
Source: eLife journal article supplement (doi:10.7554/elife.82289), 2026-05-18
Supplement: supp [file elife_poa_e82289_Figure_4_figure_supplement_1.pdf › elife_poa_e82289_Figure_4_figure_supplement_1.pdf]

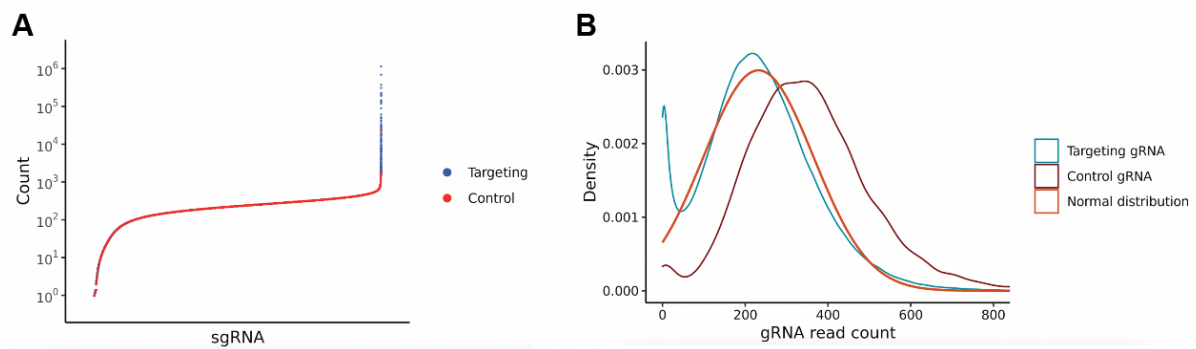

**Figure 4 – Figure Supplement 1.** CRISPR pooled screen sgRNA read counts. (A) Read counts of control sgRNA (red) and targeting sgRNA (blue) from Brie library of an undifferentiated replicate. (B) Distribution of the fraction of unique sgRNA having a given read count for total control (orange) and targeting (blue) sgRNA of an undifferentiated replicate. Normal distribution is overlaid (red). All data are representative of all samples sequenced for CRISPR screens.
